# Supplementary material
Source: PubMed Central journal article supplement (PMC8503671)
Supplement: NIHMS1734494-supplement-Supplementary_Material.pdf [file NIHMS1734494-supplement-Supplementary_Material.pdf]

## ***ADRB2 Haplotypes and Asthma Exacerbations in Children and Young Adults: An Individual Participant Data Meta-Analysis***

**Leila Karimi**<sup>1</sup>, Susanne J. Vijverberg<sup>2,3,4</sup>, Marjolein Engelkes<sup>1</sup>, Natalia Hernandez-Pacheco<sup>5,6</sup>, Niloufar Farzan<sup>2,4</sup>, Patricia Soares<sup>7</sup>, Maria Pino-Yanes<sup>6,8,9</sup>, Andrea L. Jorgensen<sup>10</sup>, Celeste Eng<sup>11</sup>, Somnath Mukhopadhyay<sup>7</sup>, Maximilian Schieck<sup>12,13</sup>, Michael Kabesch<sup>12,13</sup>, Esteban G. Burchard<sup>11,14</sup>, Fook Tim Chew<sup>15</sup>, Yang Yie Sio<sup>15</sup>, Uros Potočnik<sup>16,17</sup>, Mario Gorenjak<sup>16,17</sup>, Daniel B. Hawcutt<sup>18,19</sup>, Colin N. Palmer<sup>20</sup>, Steve Turner<sup>21</sup>, Hettie M. Janssens<sup>22</sup>, Anke H. Maitland-van der Zee<sup>2,3,4</sup>, **Katia M.C. Verhamme**<sup>1,2,3</sup> and on behalf of the PiCA and SysPharmPedia consortia

<sup>1</sup>Department of Medical Informatics, Erasmus University Medical Center, Rotterdam, the Netherlands

<sup>2</sup>Department of Respiratory Medicine, Amsterdam University Medical Centers, University of Amsterdam, Amsterdam, the Netherlands

<sup>3</sup>Department of Pediatric Respiratory Medicine, Emma Children's Hospital, Amsterdam University Medical Centers, University of Amsterdam, Amsterdam, the Netherlands

<sup>4</sup>Division of Pharmacoepidemiology and Clinical Pharmacology, Utrecht Institute for Pharmaceutical Sciences (UIPS), Faculty of Science, Utrecht University, Utrecht, the Netherlands

<sup>5</sup>Research Unit, Hospital Universitario N.S. de Candelaria, Universidad de La Laguna, Santa Cruz de Tenerife, Spain

<sup>6</sup>Genomics and Health Group, Department of Biochemistry, Microbiology, Cell Biology and Genetics, Universidad de La Laguna, San Cristóbal de La Laguna, Santa Cruz de Tenerife, Spain

<sup>7</sup>Department of Pediatrics, Brighton & Sussex Medical School, Royal Alexandra Children's Hospital, Brighton, United Kingdom

<sup>8</sup>CIBER de Enfermedades Respiratorias, Instituto de Salud Carlos III, Madrid, Spain

<sup>19</sup>Instituto de Tecnologías Biomédicas (ITB), Universidad de La Laguna, Santa Cruz de Tenerife, Spain

<sup>10</sup>Department of Biostatistics, Institute of Translational Medicine, University of Liverpool, Liverpool, United Kingdom

<sup>11</sup>Department of Medicine, University of California, San Francisco, San Francisco, California, United States

<sup>12</sup>Department of Pediatric Pneumology and Allergy, University Children's Hospital Regensburg (KUNO), Regensburg, Germany

<sup>13</sup>Department of Human Genetics, Hannover Medical School, Hannover, Germany

<sup>14</sup>Department of Bioengineering and Therapeutic Sciences, University of California, San Francisco, San Francisco, California, United States

<sup>15</sup>Department of Biological Science, National University of Singapore, Singapore

<sup>16</sup>Center for Human Molecular Genetics and Pharmacogenomics, Faculty of Medicine, University of Maribor, Maribor, Slovenia

<sup>17</sup> Laboratory for Biochemistry, Molecular Biology and Genomics, Faculty of Chemistry and Chemical Engineering, University of Maribor, Maribor, Slovenia

<sup>18</sup> Department of Women's and Children's Health, University of Liverpool, Liverpool, UK

<sup>19</sup> Alder Hey Children's Hospital, Liverpool, UK

<sup>20</sup> Division of Cardiovascular and Diabetes Medicine, University of Dundee, Ninewells Hospital and Medical School, Dundee, United Kingdom

<sup>21</sup> Child Health, University of Aberdeen, Aberdeen, United Kingdom

<sup>22</sup> Department of Pediatrics/division Respiratory Medicine and Allergology Erasmus MC/Sophia Children's Hospital, Erasmus University Medical Center, Rotterdam, Netherlands

<sup>23</sup> Department of Bioanalysis, Ghent University, Ghent, Belgium

**First author:** Leila Karimi MD, DSc

**Corresponding author:** Dr Katia M.C. Verhamme MD, PhD

Department of Medical Informatics, Erasmus University Medical Center, Rotterdam,  
the Netherlands

Postbus 2040

3000 CA ROTTERDAM

k.verhamme@erasmusmc.nl

## Contents

|                                                                                         |    |
|-----------------------------------------------------------------------------------------|----|
| Supplemental Methods.....                                                               | 4  |
| Study Population .....                                                                  | 4  |
| Supplemental Results.....                                                               | 8  |
| Table S1: Functional annotation of rs1042713 using the HaploRegv4.1 <sup>14</sup> ..... | 8  |
| Table S2: Functional annotation of rs1042714 using the HaploRegv4.1 <sup>14</sup> ..... | 9  |
| Supplemental References.....                                                            | 10 |

## Supplemental Methods

### Study Population

Data of ten independent studies participating in the Pharmacogenomics in Childhood of Asthma (PiCA) consortium<sup>1</sup> were analyzed. All the studies have been approved by their local medical ethics committees and parents and/or participants provided written consent.

*BREATHE* is an observational study that includes children and young adults (age: 3-22 years)<sup>2</sup> with physician-diagnosed asthma recruited from primary and secondary care units in Tayside, Scotland, and Brighton, United Kingdom. A detailed history including information on symptoms, treatment, asthma exacerbations, demographics, and anthropometric information was obtained from the participants. From 1,307 individuals, mouthwash samples were collected for DNA analysis and the patients were considered to be non-Hispanic whites. The Effectiveness and Safety of Treatment with Asthma Therapy in children (*ESTATE*), [www.estate-studie.nl](http://www.estate-studie.nl), is a case-control study that includes children and young adults (age: 4-19 years) with physician-diagnosed asthma recruited from primary care units in the Netherlands. Patients were selected from either the IPCI (Interdisciplinary Processing of Clinical Information) database or the PHARMO Database Network. Both databases contain the complete electronic medical records of more than one million patients throughout the Netherlands with detailed information on patient diagnosis, patient prescription (IPCI), or patient dispensing (PHARMO). During the study period (2000-2012), all children with asthma, 4 years or older and treated with asthma controller therapy were selected. Within this cohort, asthma exacerbation cases were defined as the use of systemic corticosteroids, asthma-related emergency department visits, or hospitalization. Each case was matched to four controls on age, sex, general practice (GP), and type of asthma controller therapy. Next, all potential cases and controls were invited to participate via their respective GP. If patients

agreed to participate, they completed a research questionnaire, including questions on asthma control, and provided a saliva sample (for DNA extraction).

The followMAGICS study is the follow-up study of the observational Multicenter Asthma Genetics in Childhood Study (MAGICS), which includes physician-diagnosed asthmatic children and young adults (age: 7-25 years)<sup>3</sup> recruited from secondary and tertiary centers in Germany and Austria. The ethnicity of patients was non-Hispanic whites, which was validated through principal component analysis.

The Genes-Environment and Admixture in Latino Americans (GALA II) and the Study of African Americans, Asthma, Genes, and Environments (SAGE) studies are two independent case-control asthma cohorts that focus on two different racial/ethnic groups based on the self-identified ethnicity of the four grandparents of each subject: Hispanics/Latinos (GALA II) and African Americans (SAGE). Both studies recruited unrelated children and young adults (age: 8- 21 years) using the same protocol and questionnaires from different areas in the United States and Puerto Rico (Chicago, Illinois; New York City, New York; Houston, Texas; San Francisco, California; and San Juan, Puerto Rico) for GALA.SAGE only recruited participants from the San Francisco Bay Area and California.<sup>4,5</sup> Cases were defined as subjects with physician-diagnosed asthma. Exclusion criteria were established as any of the following:  $\geq 10$  pack-years of smoking; any smoking within one year of the recruitment date; in the third trimester of pregnancy; or a history of any one of the following: sickle cell disease, cystic fibrosis, sarcoidosis, cerebral palsy, or heart or chest surgery. Exacerbations were defined as a patient-reported occurrence of at least one of the following asthma-related events during the last 12 months preceding study enrolment: emergency care, hospitalization, and oral corticosteroids use.

The Pharmacogenetics of Asthma Medication in Children Medication with Anti-inflammatory effects (PACMAN) study in the Netherlands,<sup>6</sup> is an observational cohort study

that included children (age: 4-12 years) old with self-reported regular use of asthma medication recruited through community pharmacies. Children were selected from community pharmacies in the Netherlands that belonged to the Utrecht Pharmacy Practice Network for Education and Research (UPPER).<sup>7</sup> During visits to community pharmacies, detailed information on exacerbations and medication over the last 12 months was collected. Dutch, Moroccan, and Turkish ethnicities were considered Caucasian.

The Pediatric Asthma Gene Environment Study (*PAGES*) was a cross-sectional observational study designed to relate asthma outcomes to environmental and genetic factors. Children with physician-diagnosed asthma were recruited from primary care (age: 5-16 years) and secondary care (ages 2-16 years) centers across Scotland.<sup>8</sup> In a single assessment, participants completed questionnaires with questions on demographic characteristics, asthma control, treatment, quality of life, and diet. Physiological testing was completed in a subgroup of participants and saliva was obtained for DNA extraction.<sup>8</sup>

The Pharmacogenetics of Adrenal Suppression Study (*PASS*) from the United Kingdom (age: 5-18 years) is a multicenter cohort of asthmatic children. The study initially aimed to explore the association between the use of corticosteroids and adrenal suppression. Children with asthma diagnosed by a secondary care pediatrician requiring inhaled corticosteroid therapy with clinical concern about adrenal suppression were included. The ethnicity of patients was self-reported as non-Hispanic whites.<sup>9,10</sup>

The Singapore Cross Sectional Genetic Epidemiology Study (*SCSGES*) (age: 6-31 years)<sup>11</sup> is an ongoing cross-sectional genetic epidemiology study on allergic diseases among Singapore Chinese individuals. Volunteers were of Chinese ethnicity and resident in Singapore, and their DNA was extracted from mouthwash and blood. The ethnicity of subjects was self-reported Chinese and confirmed by principal component analysis between previous genome-wide genotyping data and Han Chinese (CHB) population from the HapMap project.<sup>11,12</sup>

Asthma was defined as having a physician diagnosis of asthma symptoms prior to recruitment. The SLOVENIA study is a case-control cohort (age: 5-18) and includes asthmatic children and young adults recruited from tertiary health centers from Murska Sobota, Slovenia. Asthma was defined by physician diagnosis and hospital records. All patients were self-identified Caucasians of Slovenian origin.<sup>13</sup>

## Supplemental Results

**Table S1:** Functional annotation of rs1042713 using the HaploRegv4.1<sup>14</sup>

| Chr | pos (hg38) | LD (r <sup>2</sup> ) | LD (D') | variant    | Ref | Alt | EUR freq | Enhancer histone marks | DNase      | Motifs changed   | Selected eQTL hits | GENCODE genes            |
|-----|------------|----------------------|---------|------------|-----|-----|----------|------------------------|------------|------------------|--------------------|--------------------------|
| 5   | 148819704  | 0.9                  | 0.95    | rs35283004 | A   | G   | 0.38     | BLD, MUS               |            | GR,Maf           | 2 hits             | 6.9kb 5' of <i>ADRB2</i> |
| 5   | 148820281  | 0.81                 | 0.92    | rs71582318 | T   | C   | 0.37     | BLD, SKIN              |            | Pou1f1,TATA      |                    | 6.3kb 5' of <i>ADRB2</i> |
| 5   | 148821442  | 0.94                 | 0.97    | rs12189018 | T   | C   | 0.38     | BLD                    |            | RXRA             | 2 hits             | 5.2kb 5' of <i>ADRB2</i> |
| 5   | 148822166  | 0.94                 | 0.97    | rs35019280 | AG  | A   | 0.38     | BLD                    |            | CIZ,GATA,HNF1    | 2 hits             | 4.4kb 5' of <i>ADRB2</i> |
| 5   | 148822926  | 0.93                 | 0.97    | rs33910799 | AG  | A   | 0.38     | BLD                    | BD         | CEBPB,DMRT2      | 1 hit              | 3.7kb 5' of <i>ADRB2</i> |
| 5   | 148825014  | 0.97                 | 0.99    | rs17778257 | A   | T   | 0.38     | 9 tissues              | SKIN       | 5 altered motifs | 4 hits             | 1.6kb 5' of <i>ADRB2</i> |
| 5   | 148826178  | 0.96                 | 0.98    | rs12654778 | G   | A   | 0.38     |                        | 38 tissues | Foxp3,p53        | 4 hits             | 414bp 5' of <i>ADRB2</i> |
| 5   | 148826877  | 1                    | 1       | rs1042713  | G   | A   | 0.38     |                        | 28 tissues | 4 altered motifs | 3 hits             | <i>ADRB2</i>             |

Pos; position, LD; Linkage disequilibrium, Ref; reference, Alt; alternative, EUR freq; European frequency, eQTL; expression quantitative trait loci



**Table S2:** Functional annotation of rs1042714 using the HaploRegv4.1<sup>14</sup>

| chr | pos (hg38) | LD (r <sup>2</sup> ) | LD (D') | variant    | Ref | Alt | EUR freq | Enhancer histone marks | DNase      | Motifs changed      | Selected eQTL hits | GENCODE genes            |
|-----|------------|----------------------|---------|------------|-----|-----|----------|------------------------|------------|---------------------|--------------------|--------------------------|
| 5   | 148819436  | 0.88                 | 0.94    | rs4705059  | C   | T   | 0.59     | BLD, HRT, MUS          | HRT        | 5 altered motifs    |                    | 7.2kb 5' of <i>ADRB2</i> |
| 5   | 148819441  | 0.88                 | 0.94    | rs4705060  | G   | A   | 0.59     | BLD, MUS               |            | 4 altered motifs    |                    | 7.2kb 5' of <i>ADRB2</i> |
| 5   | 148819679  | 0.9                  | 0.96    | rs10078004 | G   | A   | 0.60     |                        |            | Mrg,NRSF            |                    | 6.9kb 5' of <i>ADRB2</i> |
| 5   | 148819882  | 0.9                  | 0.96    | rs67339154 | A   | G   | 0.60     | BLD                    |            | Brachyury,TBX5      |                    | 6.7kb 5' of <i>ADRB2</i> |
| 5   | 148820448  | 0.94                 | 0.97    | rs56330463 | T   | C   | 0.59     | BLD, SKIN              |            | PPAR                |                    | 6.1kb 5' of <i>ADRB2</i> |
| 5   | 148820990  | 0.94                 | 0.98    | rs2082382  | G   | A   | 0.60     | BLD                    | 38 tissues | Foxo,Rad21          | 2 hits             | 5.6kb 5' of <i>ADRB2</i> |
| 5   | 148821037  | 0.97                 | 0.99    | rs2082395  | A   | G   | 0.59     | BLD                    | 25 tissues | 5 altered motifs    | 2 hits             | 5.6kb 5' of <i>ADRB2</i> |
| 5   | 148821395  | 0.95                 | 0.99    | rs9325120  | C   | A   | 0.58     | BLD                    |            | 4 altered motifs    |                    | 5.2kb 5' of <i>ADRB2</i> |
| 5   | 148821692  | 0.97                 | 0.99    | rs11168066 | C   | A   | 0.59     | BLD                    |            | Dmbx1,Otx2          | 2 hits             | 4.9kb 5' of <i>ADRB2</i> |
| 5   | 148821753  | 0.96                 | 0.99    | rs11959615 | T   | A   | 0.59     | BLD                    |            |                     | 2 hits             | 4.8kb 5' of <i>ADRB2</i> |
| 5   | 148821910  | 0.97                 | 0.99    | rs35875547 | AT  | A   | 0.59     | BLD, BRN               |            | 10 altered motifs   |                    | 4.7kb 5' of <i>ADRB2</i> |
| 5   | 148821922  | 0.97                 | 0.99    | rs11958940 | A   | T   | 0.59     | BLD, BRN               |            | NRSF,Zbtb3          |                    | 4.7kb 5' of <i>ADRB2</i> |
| 5   | 148822006  | 0.97                 | 0.99    | rs34064454 | A   | G   | 0.59     | BLD, BRN               |            | AIRE,Pax-4          |                    | 4.6kb 5' of <i>ADRB2</i> |
| 5   | 148823105  | 0.97                 | 0.99    | rs11746634 | C   | G   | 0.59     | ESC, BLD               |            | LUN-1,RORalpha1     |                    | 3.5kb 5' of <i>ADRB2</i> |
| 5   | 148823238  | 0.97                 | 0.99    | rs11168067 | A   | G   | 0.59     | BLD                    |            | NRSF,Pitx2,SETDB1   |                    | 3.4kb 5' of <i>ADRB2</i> |
| 5   | 148823373  | 0.95                 | 0.99    | rs9325122  | C   | T   | 0.60     | BLD                    |            | HDAC2,Pou2f2,Pou3f3 |                    | 3.2kb 5' of <i>ADRB2</i> |
| 5   | 148824199  | 0.97                 | 0.99    | rs1432622  | T   | C   | 0.59     | BLD                    |            | 7 altered motifs    | 2 hits             | 2.4kb 5' of <i>ADRB2</i> |
| 5   | 148824445  | 0.97                 | 0.99    | rs1432623  | C   | T   | 0.59     | BLD, SKIN              |            | Nkx2                |                    | 2.1kb 5' of <i>ADRB2</i> |
| 5   | 148824558  | 0.97                 | 0.99    | rs11168068 | C   | T   | 0.59     | BLD, SKIN              |            | 8 altered motifs    |                    | 2kb 5' of <i>ADRB2</i>   |
| 5   | 148825489  | 0.97                 | 0.99    | rs2400707  | A   | G   | 0.59     | 12 tissues             | SKIN,SKIN  | HLF                 | 2 hits             | 1.1kb 5' of <i>ADRB2</i> |
| 5   | 148825809  | 0.97                 | 0.99    | rs2053044  | A   | G   | 0.59     | 5 tissues              | 35 tissues | 8 altered motifs    |                    | 783bp 5' of <i>ADRB2</i> |
| 5   | 148826364  | 0.99                 | 0.99    | rs11168070 | G   | C   | 0.59     |                        | 51 tissues | GR                  |                    | 228bp 5' of <i>ADRB2</i> |
| 5   | 148826465  | 0.99                 | 1       | rs11959427 | C   | T   | 0.59     | BRN                    | 52 tissues | 11 altered motifs   |                    | 127bp 5' of <i>ADRB2</i> |
| 5   | 148826785  | 0.98                 | 1       | rs1042711  | C   | T   | 0.59     |                        | 35 tissues | 6 altered motifs    |                    | 5'-UTR of <i>ADRB2</i>   |
| 5   | 148826812  | 0.98                 | 1       | rs1801704  | C   | T   | 0.59     | BRN                    | 37 tissues | E2A,Sin3Ak-20,ZEB1  |                    | 5'-UTR of <i>ADRB2</i>   |
| 5   | 148826910  | 1                    | 1       | rs1042714  | G   | C   | 0.59     |                        | 21 tissues | GATA,PU.1           |                    | <i>ADRB2</i>             |

Pos; position, LD; Linkage disequilibrium, Ref; reference, Alt; alternative, EUR freq; European frequency, eQTL; expression quantitative trait loci

## Supplemental References

1. Farzan N, Vijverberg SJ, Andiappan AK, et al. Rationale and design of the multiethnic Pharmacogenomics in Childhood Asthma consortium. *Pharmacogenomics*. 2017;18:931-943.
2. Tavendale R, Macgregor DF, Mukhopadhyay S, et al. A polymorphism controlling ORMDL3 expression is associated with asthma that is poorly controlled by current medications. *The Journal of allergy and clinical immunology*. 2008;121:860-863.
3. Moffatt MF, Kabesch M, Liang L, et al. Genetic variants regulating ORMDL3 expression contribute to the risk of childhood asthma. *Nature*. 2007;448:470-473.
4. Neophytou AM, White MJ, Oh SS, et al. Air Pollution and Lung Function in Minority Youth with Asthma in the GALA II (Genes-Environments and Admixture in Latino Americans) and SAGE II (Study of African Americans, Asthma, Genes, and Environments) Studies. *American journal of respiratory and critical care medicine*. 2016;193:1271-1280.
5. Nishimura KK, Galanter JM, Roth LA, et al. Early-life air pollution and asthma risk in minority children. The GALA II and SAGE II studies. *American journal of respiratory and critical care medicine*. 2013;188:309-318.
6. Koster ES, Raaijmakers JA, Koppelman GH, et al. Pharmacogenetics of anti-inflammatory treatment in children with asthma: rationale and design of the PACMAN cohort. *Pharmacogenomics*. 2009;10:1351-1361.
7. Koster ES, Blom L, Philbert D, et al. The Utrecht Pharmacy Practice network for Education and Research: a network of community and hospital pharmacies in the Netherlands. *International journal of clinical pharmacy*. 2014;36:669-674.
8. Turner SW, Ayres JG, Macfarlane TV, et al. A methodology to establish a database to study gene environment interactions for childhood asthma. *BMC medical research methodology*. 2010;10:107.
9. Hawcutt DB, Jorgensen AL, Wallin N, et al. Adrenal responses to a low-dose short synacthen test in children with asthma. *Clinical endocrinology*. 2015;82:648-656.

10. Hawcutt DB, Francis B, Carr DF, et al. Susceptibility to corticosteroid-induced adrenal suppression: a genome-wide association study. *The Lancet. Respiratory medicine*. 2018;6:442-450.
11. Andiappan AK, Sio YY, Lee B, et al. Functional variants of 17q12-21 are associated with allergic asthma but not allergic rhinitis. *The Journal of allergy and clinical immunology*. 2016;137:758-766 e753.
12. Andiappan AK, Anantharaman R, Nilkanth PP, et al. Evaluating the transferability of Hapmap SNPs to a Singapore Chinese population. *BMC genetics*. 2010;11:36.
13. Berce V, Kozmus CE, Potocnik U. Association among ORMDL3 gene expression, 17q21 polymorphism and response to treatment with inhaled corticosteroids in children with asthma. *The pharmacogenomics journal*. 2013;13:523-529.
14. HaploReg v4.1, Broad Institute, 2015. Available online: [www.broadinstitute.org/mammals/haploreg/haploreg.php](http://www.broadinstitute.org/mammals/haploreg/haploreg.php); .
